# Supplementary material
Source: publisher figshare collection journal article supplement (https://gsapubs.figshare.com/ndownloader/files/23392844)
Supplement: Supplementary file 1 [file 23392844]

## Sheet: Sheet1
Sample	Mass loss (g)
AL-WS-C	0.2222
AL-OR-C	0.295
LS-WS-C	0.0563
LS-RD-C	0.1684
AL-WS-L	0.3011
AL-OR-L	0.3616
LS-WS-L	0.238
AVERAGE	0.234657

## Sheet: G47282
Adams, S.M., and Soreghan, G.S., 2020, A test of the efficacy of sand saltation for silt production: Implications for the interpretation of loess: Geology, v. 48, https://doi.org/10.1130/G47282.1
